# Supplementary material
Source: PubMed Central journal article supplement (PMC6378984)
Supplement: supp_RA118.005779_140684_1_supp_252936_pjxpvl.pdf [file supp_RA118.005779_140684_1_supp_252936_pjxpvl.pdf]

## Supplementary Figure S1

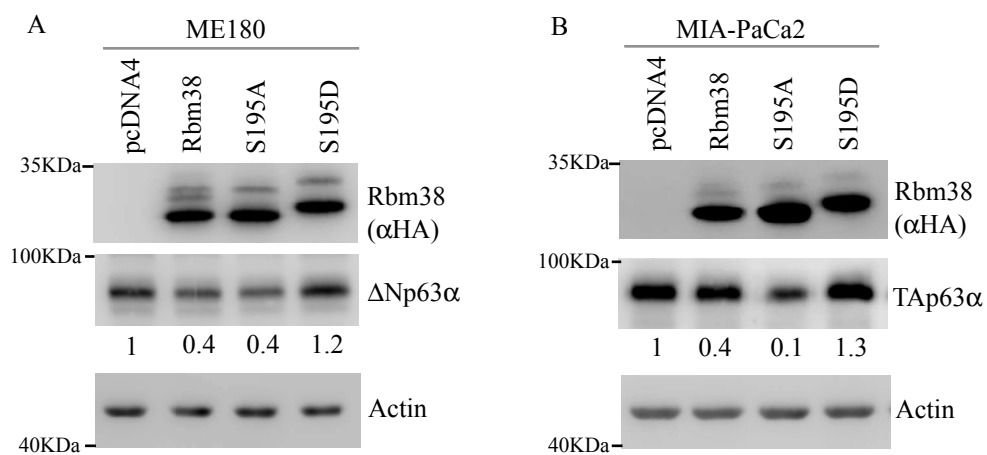

Supplemental Figure S1. Wild-type Rbm38 and S195A, but not S195D, repress p63 expression. ME180 (A) and Mia-PaCa2 (B) cells were transfected with a control vector or a vector expressing A-Rbm38, HA-S195A, or HA-S195D for 24 h, followed by western blot analysis with anti-HA, anti-p63 and anti-actin, respectively. The relative level of p63 protein and the relative ratio were shown below each lane.

## Supplementary Figure S2

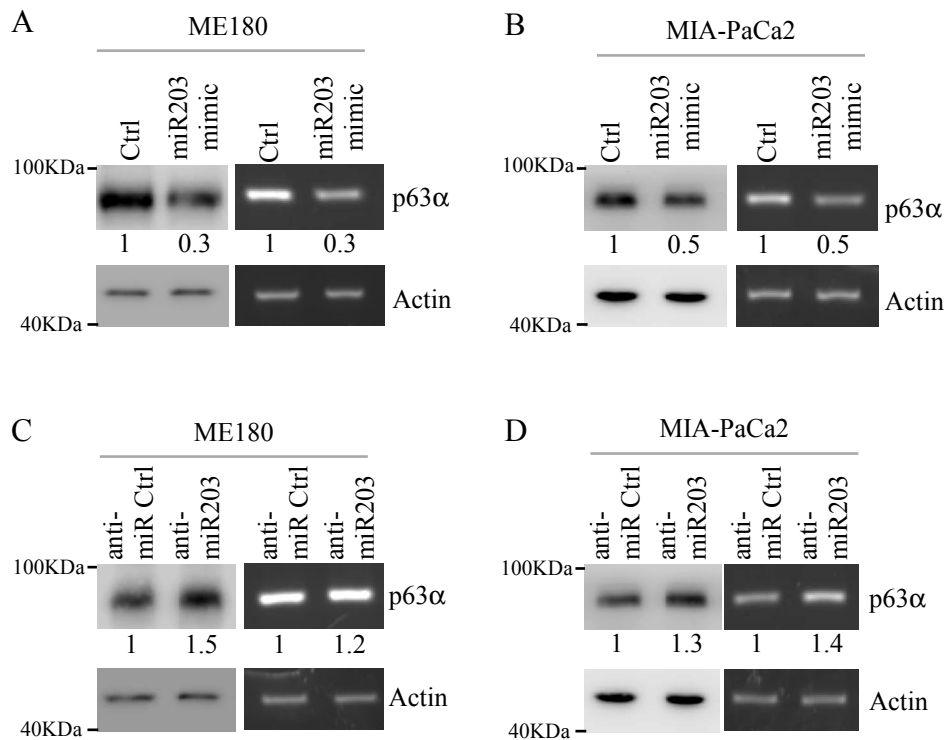

Supplemental Figure S2. Rbm38 recruits miR203 to regulate p63 mRNA stability. (A-B) miR203 decreases the level of p63 protein and mRNA. ME180 (A) or Mia-PaCa2 (B) cells were transfected with a control miRNA or miRNA203 mimic for 48 h. The levels of p63 and actin proteins (left panel) and transcripts (right panel) were measured. (C-D) anti-miR203 increases the level of p63 protein and mRNA. ME180 (C) or Mia-PaCa2 (D) cells were transfected with a control anti-miRNA or anti-miR203 for 48 h. The levels of p63 and actin proteins (left panel) and transcripts (right panel) were measured. The relative ratio was shown below each lane.
